# Supplementary material for: PON-Fold: Prediction of Substitutions Affecting Protein Folding Rate
Source: MDPI journal article supplement (doi:10.3390/ijms241613023), 2023-08-21
Supplement: s1 [file s1]

**Supplementary Table S1.** Origin of variants.

| PDB ID                                | Protein function                                       | No of variants | Technique                                    | Reference                           |
|---------------------------------------|--------------------------------------------------------|----------------|----------------------------------------------|-------------------------------------|
| Data from (Huang and Gromiha 2010)    |                                                        |                |                                              |                                     |
| 1APS                                  | acylphosphatase                                        | 24             | stopped-flow fluorimeter                     | (Chiti et al. 1999)                 |
| 1FKB                                  | FKBP12                                                 | 34             | stopped-flow fluorimeter                     | (Fulton et al. 1999)                |
| 1IMQ                                  | colicin e9 immunity protein                            | 32             | stopped-flow fluorimeter                     | (Friel et al. 2003)                 |
| 1N88                                  | ribosomal protein L23                                  | 17             | stopped-flow fluorimeter                     | (Hedberg and Oliveberg 2004)        |
| 2ABD                                  | acyl-CoA binding protein                               | 30             | stopped-flow fluorimeter                     | (Kragelund et al. 1999)             |
| 2CI2                                  | serine proteinase inhibitor                            | 68             | stopped-flow fluorimeter                     | (Itzhaki et al. 1995)               |
| 2PTL                                  | immunoglobulin light chain-binding domain of protein L | 68             | stopped-flow fluorimeter                     | (Kim et al. 2000)                   |
| 3GB1                                  | B1 domain of streptococcal protein G                   | 31             | continuous flow and stopped-flow fluorimeter | (McCallister et al. 2000)           |
| 1AJ3                                  | spectrin repeat                                        | 2              | stopped-flow cd and fluorimeter              | (Scott et al. 2004)                 |
| 1SCE                                  | cell cycle regulatory protein SU                       | 56             | stopped-flow fluorimeter                     | (Schymkowitz et al. 2000)           |
| 1TEN                                  | fibronectin type III domain from tenascin              | 39             | stopped-flow fluorimeter                     | (Hamill et al. 2000)                |
| 1TIT                                  | titin Ig repeat                                        | 26             | stopped-flow fluorimeter                     | (Fowler and Clarke 2001)            |
| 1BNR                                  | barnase                                                | 19             | stopped-flow fluorimeter                     | (Vu et al. 2004)                    |
| 1HMK                                  | $\alpha$ -lactalbumin                                  | 17             | stopped-flow cd                              | (Saeki et al. 2004)                 |
| Data from (Naganathan and Muñoz 2010) |                                                        |                |                                              |                                     |
| 1CSP                                  | major cold chock protein                               | 22             | stopped-flow fluorimeter                     | (Garcia-Mira et al. 2004)           |
| 1DIV-C                                | ribosomal protein L9                                   | 24             | stopped-flow fluorimeter                     | (Li et al. 2007)                    |
| 1DIV-N                                | ribosomal protein L9                                   | 14             | stopped-flow fluorimeter                     | (Anil et al. 2005)                  |
| 1E0L                                  | FBP28WW domain                                         | 45             | temperature jump fluorimeter                 | (Petrovich et al. 2006)             |
| 1FMK                                  | tyrosine-protein kinase c-SRC                          | 57             | stopped-flow fluorimeter                     | (Riddle et al. 1999)                |
| 1O6X                                  | imidazole glycerophosphate synthase                    | 18             | stopped-flow fluorimeter                     | (Villegas et al. 1998)              |
| 1RFA                                  | RAS-binding domain of c-RAF-1                          | 47             | stopped-flow fluorimeter                     | (Campbell-Valois and Michnick 2007) |

|      |                                   |    |                              |                             |
|------|-----------------------------------|----|------------------------------|-----------------------------|
| 1SHF | SH3 domain of FYN                 | 34 | stopped-flow fluorimeter     | (Northey et al. 2002)       |
| 1SHG | SH3 domain of spectrin            | 14 | stopped-flow fluorimeter     | (Martínez and Serrano 1999) |
| 1SS1 | protein A, B-domain               | 63 | temperature-jump fluorimeter | (Sato and Fersht 2007)      |
| 1SSO | thermostable protein              | 23 | stopped-flow fluorimeter     | (Guerois and Serrano 2000)  |
| 1ST7 | acyl-CoA binding protein          | 18 | stopped-flow fluorimeter     | (Teilum et al. 2005)        |
| 1UBQ | ubiquitin                         | 27 | stopped-flow fluorimeter     | (Went and Jackson 2005)     |
| 1W4E | peripheral-subunit binding domain | 22 | stopped-flow fluorimeter     | (Ferguson et al. 2006)      |
| 1W4J | peripheral-subunit binding domain | 22 | temperature jump fluorimeter | (Sharpe et al. 2008)        |
| 1YYJ | apocytochrome B562                | 39 | stopped-flow fluorimeter     | (Chu et al. 2002)           |

**Supplementary Table S2.** Distribution of the variant types.

| Variant | Original amino acid |   |   |   |    |     |   |    |   |    |   |    |   |   |   |    |    |    |   |   | total |
|---------|---------------------|---|---|---|----|-----|---|----|---|----|---|----|---|---|---|----|----|----|---|---|-------|
|         | A                   | C | D | E | F  | G   | H | I  | K | L  | M | N  | P | Q | R | S  | T  | V  | W | Y |       |
| A       | 0                   | 0 | 0 | 0 | 1  | 71  | 0 | 0  | 0 | 2  | 0 | 0  | 1 | 0 | 0 | 2  | 0  | 3  | 0 | 0 | 80    |
| C       | 5                   | 0 | 0 | 0 | 0  | 0   | 0 | 1  | 0 | 1  | 1 | 0  | 0 | 0 | 0 | 0  | 0  | 0  | 0 | 0 | 8     |
| D       | 27                  | 0 | 0 | 0 | 0  | 5   | 0 | 0  | 0 | 0  | 0 | 6  | 0 | 0 | 0 | 0  | 0  | 0  | 0 | 0 | 38    |
| E       | 34                  | 0 | 4 | 0 | 0  | 13  | 0 | 1  | 0 | 0  | 0 | 2  | 0 | 2 | 0 | 0  | 1  | 0  | 0 | 0 | 57    |
| F       | 25                  | 0 | 0 | 0 | 0  | 3   | 0 | 2  | 0 | 18 | 0 | 0  | 0 | 0 | 0 | 2  | 0  | 5  | 0 | 0 | 55    |
| G       | 17                  | 0 | 0 | 0 | 0  | 0   | 0 | 1  | 0 | 0  | 0 | 0  | 0 | 0 | 0 | 1  | 1  | 2  | 0 | 0 | 22    |
| H       | 5                   | 0 | 0 | 0 | 0  | 0   | 0 | 0  | 0 | 0  | 0 | 0  | 0 | 3 | 0 | 0  | 0  | 0  | 0 | 0 | 8     |
| I       | 51                  | 0 | 1 | 0 | 3  | 7   | 0 | 0  | 0 | 3  | 0 | 0  | 0 | 0 | 0 | 1  | 2  | 46 | 0 | 0 | 114   |
| K       | 32                  | 0 | 0 | 1 | 0  | 13  | 0 | 0  | 0 | 0  | 3 | 0  | 0 | 0 | 2 | 0  | 0  | 0  | 0 | 0 | 51    |
| L       | 107                 | 0 | 0 | 0 | 1  | 11  | 0 | 3  | 0 | 0  | 0 | 0  | 0 | 0 | 0 | 1  | 0  | 8  | 0 | 0 | 131   |
| M       | 7                   | 0 | 0 | 0 | 0  | 1   | 0 | 0  | 0 | 0  | 0 | 0  | 0 | 0 | 0 | 0  | 0  | 0  | 0 | 0 | 8     |
| N       | 17                  | 0 | 1 | 0 | 0  | 6   | 0 | 0  | 0 | 0  | 1 | 0  | 0 | 0 | 0 | 0  | 0  | 0  | 0 | 0 | 25    |
| P       | 22                  | 0 | 0 | 0 | 0  | 4   | 0 | 0  | 0 | 0  | 0 | 0  | 0 | 0 | 0 | 0  | 0  | 0  | 0 | 0 | 26    |
| Q       | 11                  | 0 | 0 | 0 | 0  | 9   | 0 | 0  | 0 | 0  | 0 | 0  | 0 | 0 | 0 | 0  | 0  | 0  | 0 | 0 | 20    |
| R       | 17                  | 0 | 0 | 0 | 0  | 6   | 0 | 0  | 0 | 1  | 0 | 0  | 0 | 0 | 0 | 0  | 0  | 0  | 0 | 0 | 24    |
| S       | 20                  | 0 | 0 | 0 | 0  | 8   | 0 | 0  | 0 | 0  | 0 | 1  | 0 | 0 | 0 | 0  | 1  | 0  | 0 | 0 | 30    |
| T       | 41                  | 0 | 0 | 0 | 0  | 9   | 0 | 1  | 0 | 0  | 0 | 0  | 0 | 0 | 0 | 13 | 0  | 5  | 0 | 0 | 69    |
| V       | 101                 | 0 | 0 | 0 | 1  | 10  | 0 | 4  | 0 | 3  | 0 | 0  | 0 | 0 | 0 | 0  | 5  | 0  | 0 | 0 | 124   |
| W       | 4                   | 0 | 0 | 0 | 4  | 0   | 0 | 1  | 0 | 0  | 1 | 0  | 0 | 0 | 0 | 0  | 0  | 0  | 0 | 0 | 10    |
| Y       | 30                  | 0 | 0 | 0 | 11 | 5   | 0 | 1  | 0 | 3  | 0 | 2  | 0 | 0 | 0 | 0  | 0  | 0  | 0 | 0 | 52    |
| total   | 573                 | 0 | 6 | 1 | 21 | 181 | 0 | 15 | 0 | 31 | 6 | 11 | 1 | 5 | 2 | 20 | 10 | 69 | 0 | 0 | 952   |

## References

- Anil, B., Sato, S., Cho, J.H., and Raleigh, D.P. (2005). Fine structure analysis of a protein folding transition state; distinguishing between hydrophobic stabilization and specific packing. *J Mol Biol* 354, 693-705.
- Campbell-Valois, F.X., and Michnick, S.W. (2007). The transition state of the ras binding domain of Raf is structurally polarized based on Phi-values but is energetically diffuse. *J Mol Biol* 365, 1559-1577.
- Chiti, F., Taddei, N., White, P.M., Bucciantini, M., Magherini, F., Stefani, M., and Dobson, C.M. (1999). Mutational analysis of acylphosphatase suggests the importance of topology and contact order in protein folding. *Nat Struct Biol* 6, 1005-1009.
- Chu, R., Pei, W., Takei, J., and Bai, Y. (2002). Relationship between the native-state hydrogen exchange and folding pathways of a four-helix bundle protein. *Biochemistry* 41, 7998-8003.
- Ferguson, N., Sharpe, T.D., Johnson, C.M., and Fersht, A.R. (2006). The transition state for folding of a peripheral subunit-binding domain contains robust and ionic-strength dependent characteristics. *J Mol Biol* 356, 1237-1247.
- Fowler, S.B., and Clarke, J. (2001). Mapping the folding pathway of an immunoglobulin domain: structural detail from Phi value analysis and movement of the transition state. *Structure* 9, 355-366.
- Friel, C.T., Capaldi, A.P., and Radford, S.E. (2003). Structural analysis of the rate-limiting transition states in the folding of Im7 and Im9: similarities and differences in the folding of homologous proteins. *J Mol Biol* 326, 293-305.
- Fulton, K.F., Main, E.R., Daggett, V., and Jackson, S.E. (1999). Mapping the interactions present in the transition state for unfolding/folding of FKBP12. *J Mol Biol* 291, 445-461.
- Garcia-Mira, M.M., Boehringer, D., and Schmid, F.X. (2004). The folding transition state of the cold shock protein is strongly polarized. *J Mol Biol* 339, 555-569.
- Guerois, R., and Serrano, L. (2000). The SH3-fold family: experimental evidence and prediction of variations in the folding pathways. *J Mol Biol* 304, 967-982.
- Hamill, S.J., Steward, A., and Clarke, J. (2000). The folding of an immunoglobulin-like Greek key protein is defined by a common-core nucleus and regions constrained by topology. *J Mol Biol* 297, 165-178.
- Hedberg, L., and Oliveberg, M. (2004). Scattered Hammond plots reveal second level of site-specific information in protein folding:  $\phi_i$  ( $\beta_{++}$ ). *Proc Natl Acad Sci U S A* 101, 7606-7611.
- Huang, L.T., and Gromiha, M.M. (2010). First insight into the prediction of protein folding rate change upon point mutation. *Bioinformatics* 26, 2121-2127.
- Itzhaki, L.S., Otzen, D.E., and Fersht, A.R. (1995). The structure of the transition state for folding of chymotrypsin inhibitor 2 analysed by protein engineering methods: evidence for a nucleation-condensation mechanism for protein folding. *J Mol Biol* 254, 260-288.
- Kim, D.E., Fisher, C., and Baker, D. (2000). A breakdown of symmetry in the folding transition state of protein L. *J Mol Biol* 298, 971-984.
- Kragelund, B.B., Osmark, P., Neergaard, T.B., Schiødt, J., Kristiansen, K., Knudsen, J., and Poulsen, F.M. (1999). The formation of a native-like structure containing eight conserved hydrophobic residues is rate limiting in two-state protein folding of ACBP. *Nat Struct Biol* 6, 594-601.
- Li, Y., Gupta, R., Cho, J.H., and Raleigh, D.P. (2007). Mutational analysis of the folding transition state of the C-terminal domain of ribosomal protein L9: a protein with an unusual beta-sheet topology. *Biochemistry* 46, 1013-1021.
- Martínez, J.C., and Serrano, L. (1999). The folding transition state between SH3 domains is conformationally restricted and evolutionarily conserved. *Nat Struct Biol* 6, 1010-1016.
- McCallister, E.L., Alm, E., and Baker, D. (2000). Critical role of beta-hairpin formation in protein G folding. *Nat Struct Biol* 7, 669-673.

Naganathan, A.N., and Muñoz, V. (2010). Insights into protein folding mechanisms from large scale analysis of mutational effects. *Proc Natl Acad Sci U S A* 107, 8611-8616.

Northey, J.G., Di Nardo, A.A., and Davidson, A.R. (2002). Hydrophobic core packing in the SH3 domain folding transition state. *Nat Struct Biol* 9, 126-130.

Petrovich, M., Jonsson, A.L., Ferguson, N., Daggett, V., and Fersht, A.R. (2006). Phi-analysis at the experimental limits: mechanism of beta-hairpin formation. *J Mol Biol* 360, 865-881.

Riddle, D.S., Grantcharova, V.P., Santiago, J.V., Alm, E., Ruczinski, I., and Baker, D. (1999). Experiment and theory highlight role of native state topology in SH3 folding. *Nat Struct Biol* 6, 1016-1024.

Saeki, K., Arai, M., Yoda, T., Nakao, M., and Kuwajima, K. (2004). Localized nature of the transition-state structure in goat alpha-lactalbumin folding. *J Mol Biol* 341, 589-604.

Sato, S., and Fersht, A.R. (2007). Searching for multiple folding pathways of a nearly symmetrical protein: temperature dependent phi-value analysis of the B domain of protein A. *J Mol Biol* 372, 254-267.

Schymkowitz, J.W., Rousseau, F., Irvine, L.R., and Itzhaki, L.S. (2000). The folding pathway of the cell-cycle regulatory protein p13suc1: clues for the mechanism of domain swapping. *Structure* 8, 89-100.

Scott, K.A., Batey, S., Hooton, K.A., and Clarke, J. (2004). The folding of spectrin domains I: wild-type domains have the same stability but very different kinetic properties. *J Mol Biol* 344, 195-205.

Sharpe, T.D., Ferguson, N., Johnson, C.M., and Fersht, A.R. (2008). Conservation of transition state structure in fast folding peripheral subunit-binding domains. *J Mol Biol* 383, 224-237.

Teilum, K., Thormann, T., Caterer, N.R., Poulsen, H.I., Jensen, P.H., Knudsen, J., Kragelund, B.B., and Poulsen, F.M. (2005). Different secondary structure elements as scaffolds for protein folding transition states of two homologous four-helix bundles. *Proteins* 59, 80-90.

Villegas, V., Martínez, J.C., Avilés, F.X., and Serrano, L. (1998). Structure of the transition state in the folding process of human procarboxypeptidase A2 activation domain. *J Mol Biol* 283, 1027-1036.

Vu, N.D., Feng, H., and Bai, Y. (2004). The folding pathway of barnase: the rate-limiting transition state and a hidden intermediate under native conditions. *Biochemistry* 43, 3346-3356.

Went, H.M., and Jackson, S.E. (2005). Ubiquitin folds through a highly polarized transition state. *Protein Eng Des Sel* 18, 229-237.
